# Supplementary material
Source: PubMed Central journal article supplement (PMC2930687)

## SUPPLEMENTAL INFORMATION

### FIGURE LEGEND

**Figure S1: MMP inhibitors do not increase invasion inhibition of H1299 cells, simultaneously treated with anti-uPAR antagonistic antibodies, through a Matrigel/Collagen I matrix.** H1299 cells were treated with an anti-uPAR antagonistic antibody (2G10 or 3C6), an MMP inhibitor (GM6001 or anti-MT1-MMP), or both. Treated cells were seeded on Matrigel/Collagen I transwell and allowed to invade through to the bottom of the transwell for 24 hours. Anti-uPAR antagonistic antibodies do not appear to increase inhibition above that achieved by MMP inhibitors alone.

### FIGURE

S1.

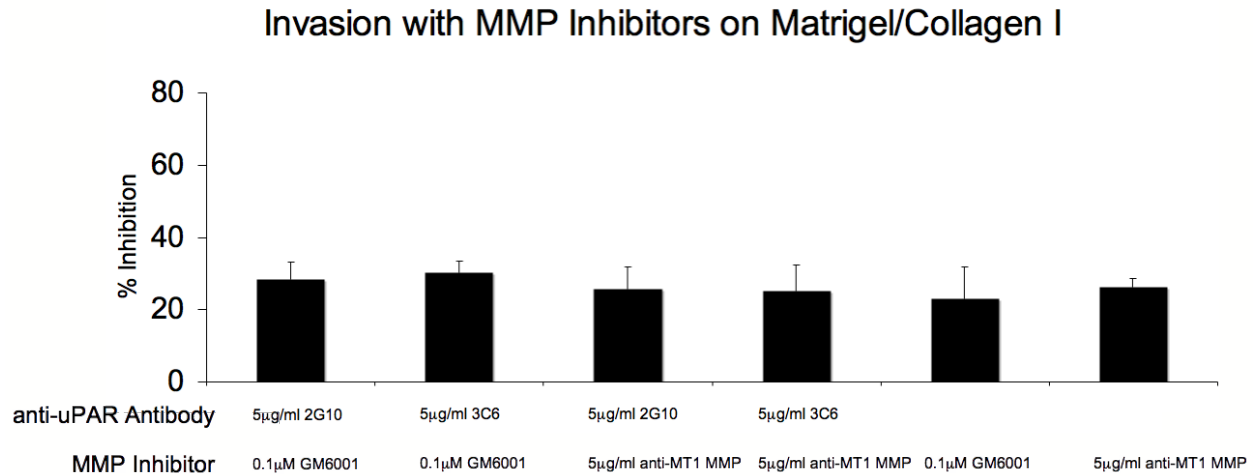

Supplement: supp_M109.077677_jbc.M109.077677-1.pdf [file supp_M109.077677_jbc.M109.077677-1.pdf]
